# Supplementary material for: Effect of Amniotic Membrane/Collagen-Based Scaffolds on the Chondrogenic Differentiation of Adipose-Derived Stem Cells and Cartilage Repair
Source: PubMed Central journal article supplement (PMC8657407; doi:10.3389/fcell.2021.647166), 2021-11-25
Supplement: Image1.pdf [file Image1.pdf]

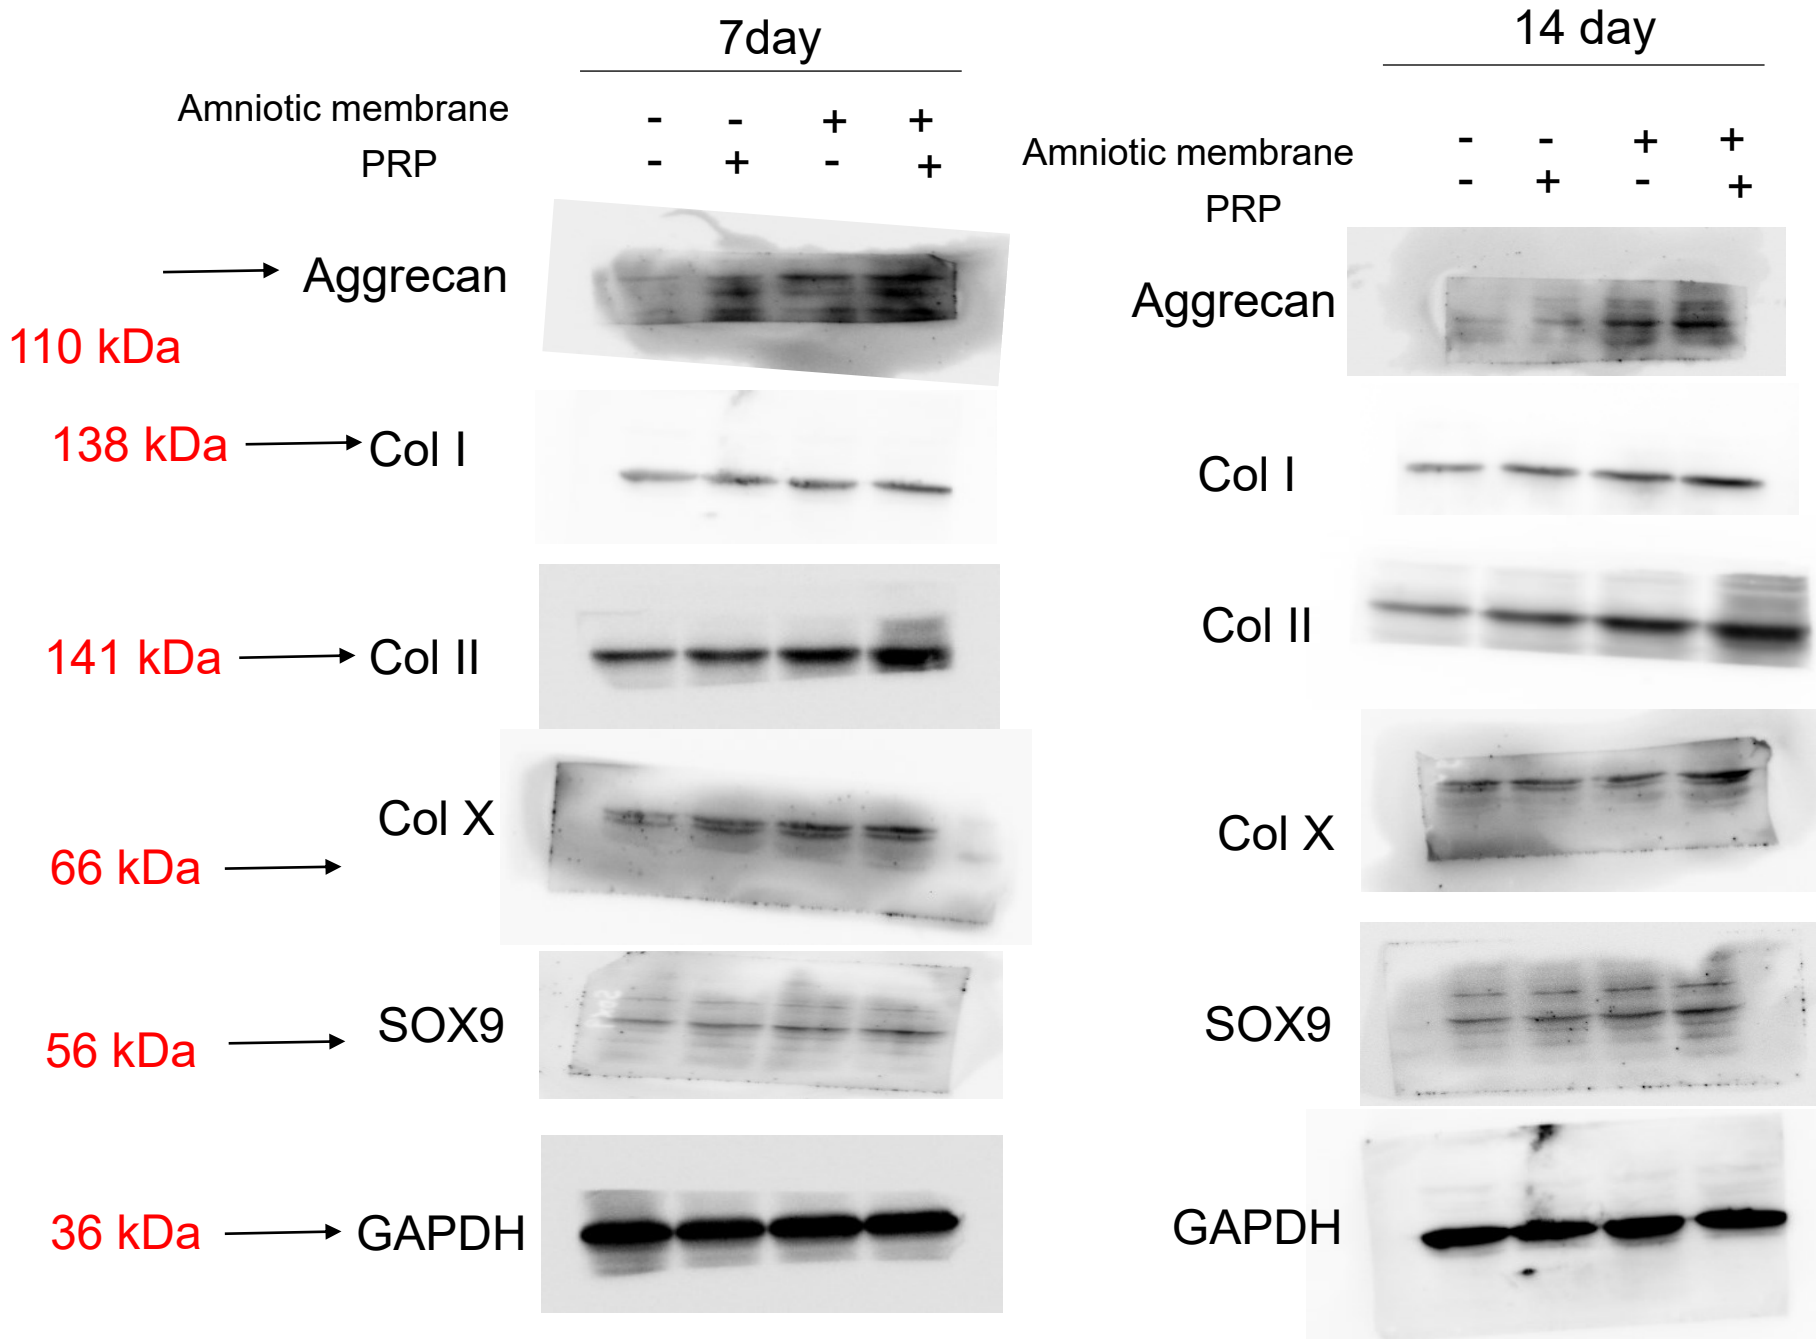

Figure S1. The original bands for figure 4A

|               |   |   |   |   |   |   |
|---------------|---|---|---|---|---|---|
| CK            | + | - | - | - | - | - |
| AM            | - | + | - | - | + | + |
| ADSC          | - | - | + | + | + | + |
| PRP<br>marker | - | - | - | + | - | + |

110 kDa → Aggrecan

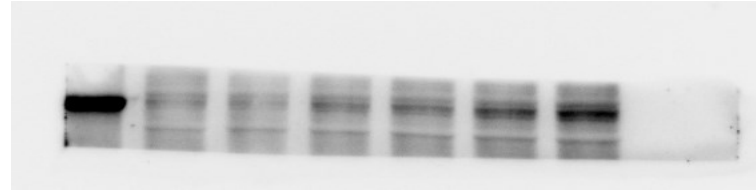

138 kDa → Col I

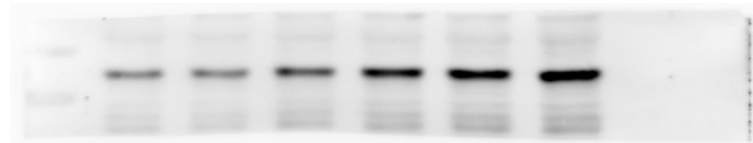

141 kDa → Col II

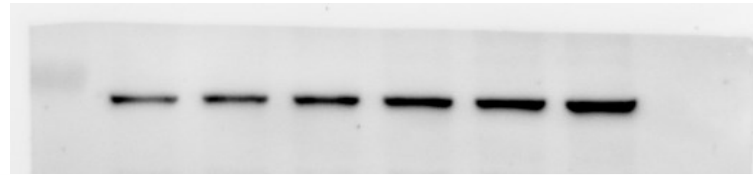

66 kDa → Col X

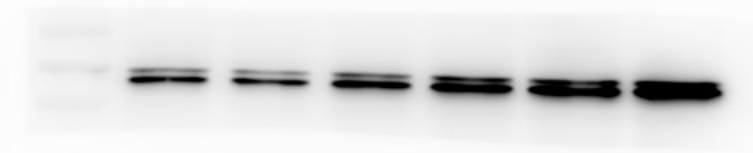

56 kDa → SOX9

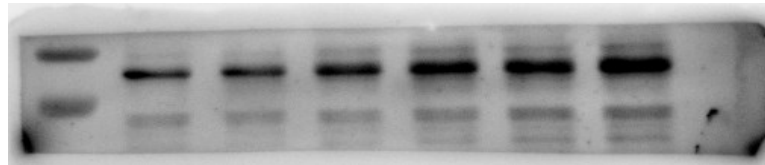

36 kDa → GAPDH

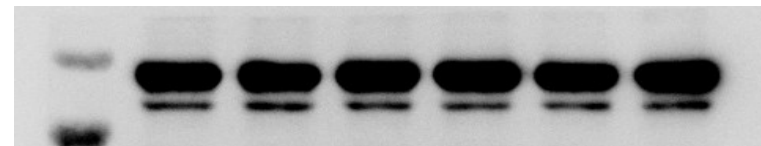

Figure S1. The original bands for figure 8A

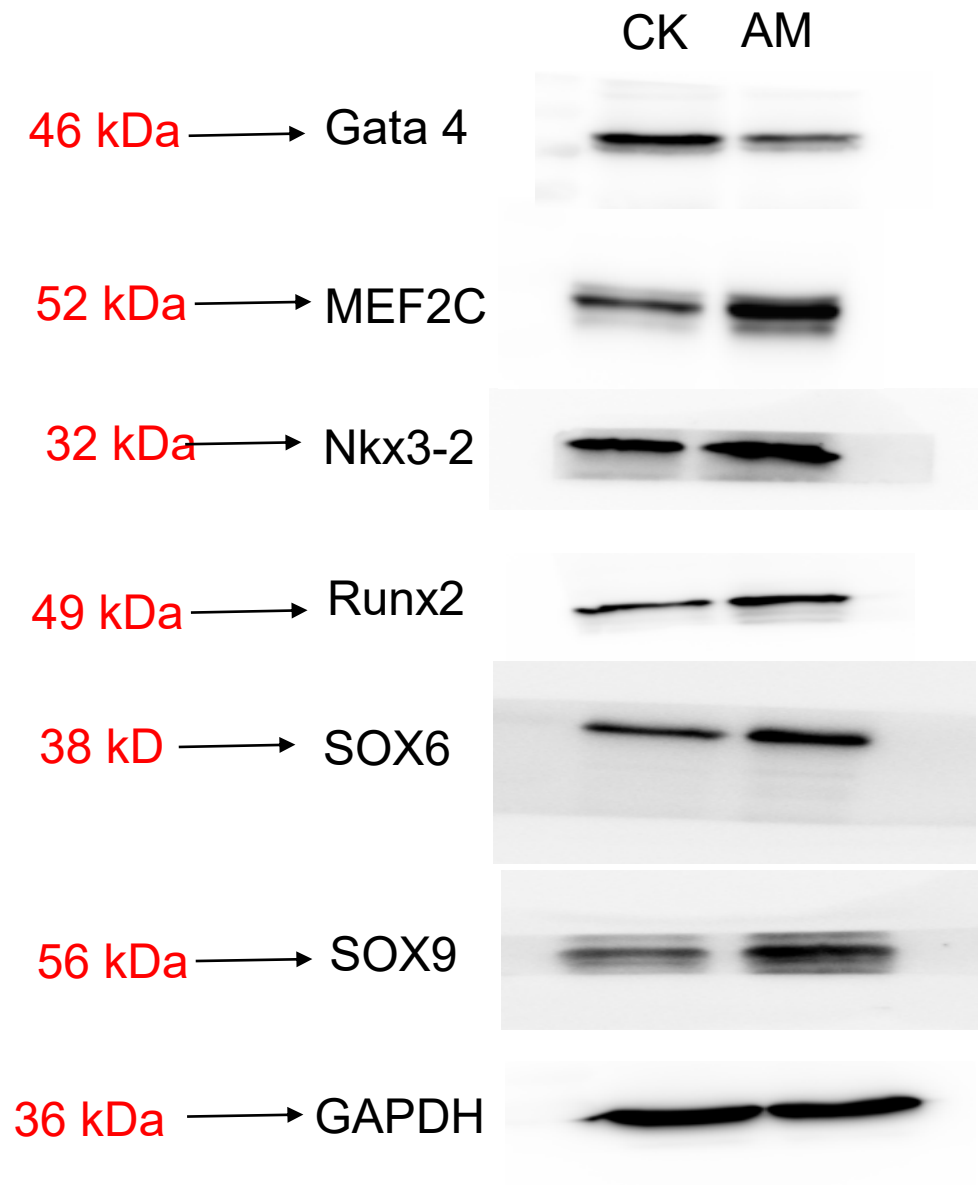

Figure S3. The original bands for figure 9A
